# Supplementary material for: Insight from the association between critical thinking and English argumentative writing: catering to English learners’ writing ability
Source: PeerJ. 2023 Nov 20;11:e16435. doi: 10.7717/peerj.16435 (PMC10666613; doi:10.7717/peerj.16435)
Supplement: Supplemental Information 1 [file peerj-11-16435-s001.xls]

## Sheet: Sheet1
Disciplin	WritingProficiency	an1	an2	an3	an4	an5	an6	an7	an8	an9	an10	an11	an12	an13	an14	an15	an16	an17	an18	an19	an20	an21	an22	an23	an24	an25	an26	an27	an28	an29	an30	an31	an32	an33	an34	an35	an36	an37	an38	an39	an40	an41	an42	an43	an44	an45	an46
1	18	3	2	1	4	4	4	2	3	4	4	1	3	5	2	4	4	4	2	5	1	4	2	2	4	3	3	4	1	5	4	4	2	4	3	4	1	5	2	5	1	4	2	6	2	6	5
1	19	3	2	3	3	6	5	6	5	5	5	3	5	5	6	2	5	4	3	5	6	5	3	1	4	3	3	4	2	6	6	4	2	4	6	3	1	6	3	6	2	4	2	4	4	5	6
1	19	3	1	3	4	5	4	5	6	3	4	2	2	6	6	5	2	3	2	6	1	3	3	3	2	3	2	6	1	2	6	6	1	2	1	1	1	6	2	1	3	6	6	2	3	6	3
1	21	4	2	1	5	6	4	3	4	3	3	2	5	6	6	3	2	3	2	4	2	3	3	1	3	2	3	4	2	3	4	5	2	3	3	1	2	6	2	4	1	3	2	6	2	5	4
1	21	3	4	2	3	5	5	6	4	4	6	1	3	6	4	6	2	5	3	4	1	5	4	2	2	4	5	4	2	6	4	3	2	3	2	1	2	5	1	5	3	4	3	3	2	6	5
1	16	2	1	3	6	4	5	6	6	5	4	3	5	3	1	4	2	5	2	4	2	5	2	1	5	3	4	6	3	5	4	6	2	3	6	3	2	4	5	6	3	1	2	4	5	4	6
1	20	1	3	6	6	3	5	6	4	4	6	2	3	6	6	4	3	6	2	6	1	4	4	3	6	5	2	4	2	6	5	5	3	2	2	1	1	6	2	1	6	5	6	6	4	6	4
1	19	2	2	3	2	5	6	5	5	5	5	5	6	6	4	4	5	5	2	5	4	5	4	4	2	4	5	6	2	5	5	5	3	4	4	5	2	2	2	5	2	3	2	6	2	5	6
1	16	3	6	1	6	6	2	6	6	5	5	1	1	6	3	1	3	5	5	6	2	5	6	1	4	3	6	6	3	6	3	6	3	6	4	1	1	3	1	3	4	6	4	5	5	6	6
1	21	4	3	2	4	4	5	3	5	3	5	2	6	6	6	4	2	4	1	6	2	3	2	3	2	3	3	4	2	3	4	5	2	3	2	1	2	3	3	4	4	3	3	4	2	2	5
1	17	2	3	3	2	6	3	2	1	3	6	3	2	2	5	2	3	4	2	5	2	5	3	2	2	3	3	3	2	4	3	5	2	3	4	3	2	4	3	4	2	3	1	2	2	6	6
1	20	3	6	6	3	3	2	6	5	4	2	3	3	3	6	1	3	1	2	6	2	3	2	5	2	6	1	6	2	5	3	4	3	3	6	5	1	3	3	5	5	4	4	3	3	2	3
1	19	2	4	1	6	6	6	6	5	5	4	1	2	6	6	6	2	6	1	6	1	4	4	3	1	6	3	4	1	6	6	6	2	3	2	3	1	6	1	6	5	6	2	6	1	6	6
1	18	2	4	3	4	5	3	3	2	5	4	3	3	4	2	4	2	4	1	3	2	4	4	2	2	3	3	3	2	4	4	5	2	5	2	3	3	6	3	5	2	3	2	5	1	3	4
1	20	3	4	3	1	3	6	4	4	2	4	1	3	1	6	3	2	2	2	4	2	2	2	2	2	2	2	3	2	6	2	6	2	3	2	1	2	6	3	6	4	4	2	6	2	6	3
1	21	2	1	2	6	5	3	3	2	5	6	1	2	5	5	3	2	5	3	5	1	3	3	1	1	3	3	3	1	4	3	4	2	3	3	1	3	5	2	6	2	4	2	6	2	6	4
1	20	1	6	6	6	6	6	6	1	1	3	1	6	6	6	3	1	3	6	6	1	3	6	1	1	6	1	6	1	6	6	6	6	3	6	1	1	6	1	6	6	6	6	6	6	1	1
1	19	3	5	1	2	3	2	6	3	3	4	1	2	4	4	2	2	2	3	5	2	3	2	1	3	3	2	1	3	2	3	6	2	3	2	2	2	6	3	4	5	4	2	6	6	6	3
1	17	4	4	2	1	3	2	5	5	3	5	3	5	5	6	6	4	5	3	5	2	5	5	2	3	3	2	4	2	5	5	5	2	3	5	2	1	5	1	6	2	5	3	6	2	6	4
1	21	3	6	6	2	3	5	3	6	6	3	1	1	5	6	4	6	3	5	6	1	1	6	6	1	6	5	6	1	4	5	3	1	4	2	1	6	6	3	6	3	2	6	6	2	6	6
1	17	2	1	1	5	5	3	3	4	5	5	1	2	3	4	3	2	3	5	6	3	4	3	2	2	2	3	5	2	5	3	3	2	4	5	6	2	4	4	2	4	4	2	6	3	5	5
1	21	3	4	5	4	4	4	5	5	5	5	2	2	3	5	2	3	3	3	4	2	3	3	2	2	3	3	4	3	4	3	3	2	3	3	2	3	5	2	4	3	3	4	5	4	4	3
1	20	3	1	4	1	6	4	6	3	2	5	2	1	6	6	6	2	6	1	6	1	3	6	5	3	4	4	4	1	6	6	6	1	6	3	1	1	6	1	6	3	5	5	6	6	6	6
1	11	2	3	4	6	4	3	6	5	4	4	1	2	4	5	3	3	4	1	4	1	2	5	2	2	4	5	4	2	5	4	3	2	3	6	5	3	6	3	6	6	4	3	5	1	4	3
1	18	2	2	2	1	2	1	1	2	2	2	1	1	2	2	2	2	2	2	2	2	3	3	1	2	3	3	2	1	2	6	3	1	6	6	4	1	6	1	6	1	4	3	6	4	6	6
1	19	3	3	2	4	3	5	4	4	3	1	2	5	3	3	1	5	1	6	1	3	3	2	2	4	4	3	4	1	3	4	2	1	4	2	1	1	3	1	4	1	4	1	5	3	3	3
1	17	2	5	1	3	4	6	5	5	4	5	2	1	5	3	2	4	4	2	4	1	4	4	2	1	4	3	6	3	4	4	3	2	3	4	3	1	5	2	6	4	6	1	6	3	5	5
1	20	1	1	1	2	6	5	6	2	6	6	1	2	6	3	6	1	6	1	5	2	6	6	1	2	5	6	3	1	1	1	4	1	6	2	1	2	6	1	6	2	6	1	6	2	6	6
1	14	2	3	3	6	6	6	6	6	4	1	3	6	4	6	6	6	6	3	6	1	3	4	1	2	6	1	6	4	6	6	6	1	2	6	3	1	6	1	6	4	6	1	6	6	6	6
1	19	4	4	2	3	3	1	2	1	5	5	3	6	2	5	6	1	5	2	3	4		2	3		5	2	1	2	4		3	2	1	3	5	2	5	3	5	6	6	4	2	6	3	2
1	21	3	6	2	4	6	6	5	5	4	3	1	6	6	6	6	5	3	5	5	6	6	6	1	2	5	3	4	4	5	3	6	1	4	6	6	1	6	6	6	4	3	4	6	2	6	6
1	16	2	4	5	5	3	5	5	3	5	4	5	6	6	2	4	2	6	4	6	1	3	2	3	3	2	3	6	3	5	4	6	3	5	5	2	4	5	3	4	5	3	1	5	2	1	6
1	18	3	3	3	6	6	1	6	1	3	6	1	3	6	6	6	3	6	2	3	1	6	6	1	6	3	3	5	1	3	3	6	3	3	3	1	1	3	3	5	4	4	2	4	4	5	5
1	17	4	3	1	6	6	2	6	4	3	5	1	6	5	6	6	3	5	1	6	6	5	6	1	1	3	2	6	1	3	5	6	1	4	3	1	1	6	1	6	6	6	1	6	2	6	2
1	20	2	2	3	2	4	4	5	2	5	5	1	2	6	6	3	2	6	2	6	1	5	4	1	1	5	4	3	1	6	5	5	4	5	2	1	2	6	2	5	1	5	1	6	4	6	5
1	19	2	3		4	5	4	5	4	6	4	5	4	3	4	5	5	4	4	2	5	2	4	2	3	4	3	4	4	5	5	5	2	3	3	2	3	4	2	5	4	4	3	6	2	5	6
1	20	2	6	1	3	6	2	4	4	5	6	1	1	6	4	3	1	5	2	6	1	5	4	1	2	4	4	6	2	5	6	3	1	6	2	4	3	4	1	3	1	5	4	6	2	6	6
1	19	4	5	2	1	2	2	4	2	5	5	1	4	4	6	3	3	4	2	6	2	3	3	5	3	3	3	5	2	5	5	4	2	3	4	1	1	4	1	2	2	3	3	6	3	2	5
1	19	3	3	1	3	4	2	3	3	3	5	1	3	5	4	5	1	4	3	5	1	3	3	1	1	4	3	4	1	4	5	3	1	3	1	1	2	4	2	5	2	3	1	5	2	5	5
1	17	5	4	5	3	4	6	4	6	3	3	2	2	3	4	2	3	4	1	6	3	2	2	3	3	4	3	6	3	3	3	3	2	3	6	2	2	6	3	3	4	4	1	6	5	6	2
1	20	3	4	4	6	2	2	6	6	1	1	3	2	3	5	2	3	2	5	5	2	2	3	2	3	3	1	6	4	3	3	5	3	4	4	1	1	2	3	6	6	4	6	6	3	3	4
1	15	4	4	3	3	3	4	5	4	2	3	3	1	3	2	5	2	5	2	4	1	5	3	1	2	3	3	5	1	5	4	6	1	4	3	3	1	4	1	5	2	3	2	5	2	5	6
2	13	4	2	2	3	2	4	2	3	3	3	2	4	2	3	4	3	3	3	3	4	3	2	4	3	4	3	3	2	4	3	3	3	3	3	2	3	3	3	4	2	2	2	3	4	2	3
2	20	4	3	4	6	4	5	6	6	3	2	5	2	5	6	5	4	2	3	3	2	3	5	1	2	6	3	5	1	5	5	3	1	3	5	5	2	5	4	5	3	3	2	6	3	5	5
2	15	5	3	3	6	4	1	6	1	3	6	1	4	6	6	3	5	3	1	3	1	6	4	6	1	4	1	4	1	6	6	5	1	3	6	1	1	6	4	6	1	3	4	6	4	6	6
2	15	4	4	1	6	3	5	6	3	3	3	2	2	4	5	1	3	5	6	5	3	4	5	1	3	2	1	6	3	6	2	3	4	3	2	3	2	4	3	2	3	2	4	3	3	2	3
2	19		6	2	6	6	6	6	3	3	4	4	2	4	5	4	6	3	2	6	1	4	3	3	2	4	2	5	1	6	3	5	1	4	6	1	2	6	3	6	4	1	4	4	4	6	6
2	19	2	4	3	5	5	3	3	4	5	5	2	2	5	5	4	2	4	4	5	4	4	4	2	2	5	5	4	2	4	4	4	2	4	2	4	2	4	2	5	4	3	2	5	4	4	5
2	14	2	4	2	3	4	3	6	4	4	5	4	4	4	4	4	2	5	3	5	4	4	4	3	4	4	4	4	4	4	4	4	3	4	2	4	4	2	4	4	4	4	4	2	4	4	3
2	19	3	3	6	1	6	6	3	3	3	3	3	3	3	6	6	5	4	4	4	1	3	3	1	1	3	3	6	3	6	4	6	1	3	3	1	3	3	1	3	3	6	6	6	4	3	5
2	18	3	1	2	1	1	3	6	6	2	2	3	3	2	6	2	1	3	2	4	1	1	2	2	1	3	4	4	2	5	5	4	1	1	3	3	1	3	2	6	1	6	5	6	3	3	3
2	18	3	4	4	3	5	2	3	2	4	4	1	2	3	3	3	1	5	3	1	1	3	3	1	3	2	6	6	2	6	5	5	3	3	5	5	2	6	1	3	4	5	1	4	2	5	4
2	19	3	3	3	3	3	6	2	3	2	3	1	6	3	6	1	2	3	3	6	1	3	1	1	1	6	4	4	1	6	4	3	2	3	2	6	1	6	1	6	1	6	3	6	2	6	2
2	20	3	3	2	1	5	5	5	3	3	6	1	1	5	6	5	2	5	1	1	2	4	4	2	2	3	3	4	2	6	6	3	2	4	2	1	3	5	1	5	2	3	1	6	2	6	6
2	21	2	1	2	3	6	4	3	3	3	4	3	1	4	4	4	2	3	1	3	1	3	3	2	2	3	3	3	1	3	4	3	2	3	1	2	1	6	1	4	2	3	2	6	2	3	3
2	18	4	6	3	6	6	6	6	6	6	5	1	1	6	6	4	3	6	1	6	1	3	4	1	2	3	1	2	1	6	6	6	1	3	2	1	1	6	1	6	1	6	1	6	5	6	1
2	18	3	3	2	6	5	4	6	4	5	6	1	3	5	6	6	4	5	4	6	2	4	4	2	3	5	3	4	2	4	4	4	1	3	4	2	2	6	3	6	4	4	2	6	3	5	6
2	20	4	3	4	4	4	2	3	2	2	6	2	2	4	4	3	2	4	2	5	2	3	2	2	2	4	4	5	2	4	4	3	2	3	2	2	2	3	2	4	3	3	2	4	2	4	4
2	21	4	3	2	5	6	3	6	5	2	6	3	2	6	5	6	3	3	2	6	2	2	3	3	3	3	5	5	2	6	4	3	2	5	3	1	2	4	4	5	4	4	3	4	5	6	6
2	19	3	5	3	2	4	5	6	2	2	3	1	1	5	5	2	4	5	6	5	1	4	3	2	3	4	4	5	2	4	5	6	2	4	4	2	2	6	2	3	2	4	2	6	2	6	3
2	21	5	5	3	3	4	2	4	3	2	2	2	2	4	5	3	1	3	3	3	1	3	2	4	4	3	2	2	2	3	3	4	2	4	4	1	2	3	4	4	3	5	4	4	2	2	2
2	15	5	6	3	4	6	2	4	5	3	5	2	2	6	6	4	6	3		4	2	3	3	2	2		3	6	1	5	5	5	2	2	4	1	1	3	2	5	3	3	5	5	3	5	5
2	21	4	3	3	2	4	5	4	3	2	5	4	4	4	4	2	3	2	3	5	2	3	4	1	4	3	4	6	2	3	4	3	2	3	5	2	2	5	2	6	5	3	4	5	2	5	4
2	18	3	3	2	2	3	1	2	1	4	3	1	1	6	4	5	1	3	6	6	4	3	3	5	2	2	2	1	2	6	6	1	1	3	3	1	1	6	1	4	2	4	4	5	5	6	3
2	20	3	3	2	2	3	2	2	3	3	4	4	1	3	3	3	2	3	4	3	4	2	4		3	3	2	4	3	2	3	3	3	3	2	4	3	2	3	3	3	2	3	4	3	3	2
2	19	4	4	3		5	4	2	3	1	2	1	4	1	2	1	2	6	6	6	2	1	2	2	6	2	1	6	2	5	5	4	4	1	6	1	6	6	4	3	6	4	6	4	6	1	4
2	20	4	5	4	3	4	6	6	2	4	4	6	4		5	5	3	4	3	5	1	3	4	6	1	2	3	3	1	4	5	4	1	5	3	3	2	5	2	6	5	4	4	6	3	6	6
2	19	4	3	4	4	3	4	6	6	2	3	3	2	3	4	2	4	3	4	5	2	3	3	1	4	3	2	3	3	4	3	4	1	3	6	3	2	4	4	5	3	4	3	4	3	3	4
2	17	3	3	2	3	3	5	5	4	1	3	1	1	6	4	2	3	3	4	5	2	3	3	3	2	3	2	4	2	5	4	5	2	4	4	3	2	5	3	4	5	4	3	5	4	4	3
2	18	4	4	1	4	4	2	6	3	2	4	1	1			4	4	3	4	3	1	3	4	1	3	4	2	6	3	4	3	2	1	4	4	2	1	6	3	6	1	4	2	4	5	6	6
2	18	5	5	4	5	2	5	6	4	2	3	1	4	4	5	3	3	3	3	6	1	3	2	1	2	2	2	5	3	3	3	4	1	3	2	1	1	5	3	4	4	4	5	6	2	4	3
2	20	3	1	1	6	6	6	5	5	3	6	1	1	6	6	3	4	4	3	5	1	2	3	1	2	4	3	3	2	6	2	6	1	4	2	1	1	5	2	6	6	5	2	6	1	6	5
2	18	5	4	2	2	6	5	3	4	5	5	2	2	4	4	5	2	3	2	5	2	5	1	2	2	3	2	3	2	5	3	5	2	3	3	3	2	5	2	3	2	3	2	5	4	6	6
2	16	3	3	4	2	5	3	3	4	3	5	2	2	3	4	3	4		2	4	3	4	2	3	2	3	2	2	3	3	3	3	2	3	2	3		4	2	3		2	3	3	3	4	2
2	19	3	3	2	4	3	4	4	4	3	4	2	1	4	4	2	2	2	3	1	4	4	3	3	2	3	4	3	1	3	3	3	2	2	3	1	2	4	2	4	3	3	3	5	2	4	5
2	18	4	3	3	2	3	4	4	4	2	2	4	3	4	3	1	2	1	4	6	2	2	2	1	2	4	2	5	2	5	3	5	1	3	4	1	2	5	1	5	2	3	6	6	4	5	4
2	15	4	4	3	4	5	6	6	1	4	5	1	1	6	6	4	1	5	3	6	1	4	6	1	1	4	3	6	2	3	5	4	2	5	3	1	2	5	2	6	3	3	1	5	4	6	6
2	19	4	3	3	4	4	4	3	3	4	5	3	5	4	3	4	4	4	4	3	4	4	4	5	4	4	4	4	4	4	4	4	3	4	3	4	4	3	4	4	3	4	4	3	4	3	4
2	18	1	5	2	2	4	4	3	3	3	1	5	1	5	1	3	4	5	3	3	5	3	4	5	3	3	3	4	4	4	4	4	3	2	3	2	3	2	3	2	3	3	3	2	3	4	2
2	20	4	5	1	1	5	5	4	1	3	5	1	4	6	6	5	1	6	4	5	1	5	2	1	1	3	3	5	1	6	6	5	1	5	4	1	5	6	1	6	1	4	6	6	3	6	4
2	15	4	4	1	1	3	2	1	1	3	5	2	2	5	6	2	1	6	3	4	2	3	1	1	5	3	3	6	1	6	5	5	2	3	6	2	1	4	2	2	1	6	1	5	2	5	6
2	18	3	3	5	5	5	5	3	1	3	1	3	3	3	2	1	4	4	6	6	4	1	6	4	4	4	4	4	6	3	6	3	3	3	3	3	3	3	3	3	3	4	1	3	1	6	6
2	16	4	3	5	3	4	3	3	4	4	4	6	6	6	6	4	4	4	3	6	5	3	6	1	1	6	4	4	2	5	6	1	1	3	1	1	4	6	2	4	1	6	1	3	6	1	6
2	19	6	4	3	3	3	5	6	6	3	3	5	3	5	5	3		3	4	6	6	4	5	2	2	4	3	1	1	6	4	4	1	3	4	3	5	5	4	6	4	6	6	6	5	6	2
2	16	4	3	2	6	3	3	3	3	4	3	1	2	3	6	2	2	4	2	5	2	4	3	1	1	4	2	3	2	3	3	4	2	3	3	1	2	3	2	3	2	3	2	4	3	4	2
2	17	3	3	4	5	4	3	5	3	3	3	2	2	5	5	6	3	3	2	5	2	3	3	2	2	3	3	3	2	3	3	3	2	3	5	3	2	6	2	3	3	3	3	6	4	6	3
2	13	3	5	2	1	3	3	2	2	3	1	1	1	3	2	1	2	2	4	4	2	2	2	1	2	6	3	4	2	4	3	3	1	2	3	4	1	5	3	2	2	2	4	4	4	4	4
2	16	6	5	5	6	5	5	6	5	5	6	2	5	5	5	2	6	6	1	6	5	5	4	5	2	5	2	5	5	5	4	6	2	4	4	2	2	5	6	4	6	4	6	6	6	6	5
2	18	3	3	3	5	3	1	6	3	2	3	2	1	6	1	3	3	4	4	6	1	2	3	1	2	4	3	4	2	5	2	5	1	1	2	1	1	4	2	6	3	4	1	5	3	2	2
1	21	1	6	4	2	6	2	6	6	6	6	1	3	6	6	6	2	6	2	6	1	5	5	1	5	5	5	6	1	6	6	6	1	5	1	1	2	6	1	5	3	4	1	6	4	5	6
1	22	3	3	3	4	4	3	5	5	4	5	3	2	5	5	4	3	4	2	5	3	5	4	2	2	3	3	4	2	4	4	3	3	3	3	1	1	5	2	5	3	4	3	4	3	5	5
1	19	4	2	4	5	3	4	2	5	5	2	2	2	5	6	1	5	4	6	6	2	2	5	1	2	2	2	6	2	5	2	3	1	2	6	1	2	3	1	6	2	5	5	6	1	2	5
1	22	3	3	4	6	6	2	2	2	2	4	1	3	3	6	3	5	3	3	6	1	3	5	1	3	3	2	4	3	6	6	3	6	3	2	1	1	2	1	5	1	3	3	6	1	6	3
1	17	1	6	3	4	6	6	3	5	5		3	1	5	5	3	2	5	1	2	3	3	3	2	1	3	4	3	4	4	2	3	2	4	5	5	1	4	1	4	3	4	2	4	2	1	5
1	18	3	2	1	1	1	3	2	4	3	2	6	6	3	1	6	4	2	4	1	3	3	5	6	3	3	1	3	6	1	3	1	4	3	3	6	6	3	6	1	4	4	6	1	2	1	3
1	18	2	6	5	2	5	6	6	6	5	2	6	5	5	6	4	3	5	1	6	2	4	3	2	1	5	3	4	1	5	4	2	1	5	2	3	1	3	6	6	6	6	5	4	2	6	5
1	16	3	2	3	2	5	4	5	2	4	6	6	4	5	5	4	2	5	3	5	2	5	5	1	2	4	5	5	2	5	5	5	2	4	5	2	5	3	2	2	2	4	2	6	2		5
1	18	3	5	3	2	5	5	6	5	4	5	3	4	5		2	4	4	3	6	1	4	3	3	3	3	4	5	4	4	5	5	3	4	4	5	2	5	3	5	2	3	2	5	2	5	5
1	17	1	1	1	6	6	5	3	1	6	3	2	1	6	6	6	4	6	3	6	1	6	6	1	2	6	3	1	1	6	6	6	1	6	1	1	4	6	1	4	4	6	6	6	4	1	6
1	16	2	3	3	5	3	5	5	2	3	3	1	6	5	6	2	4	4	2	4	2	3	3	2	3	3	1	6	1	6	6	5	4	3	4	3	1	6	2	6	1	2	1	6	5	4	5
1	20	2	2	2	3	3	4	3	3	3	3	2	2	4	5	3	2	3	2	3	2	3	3	2	2	2	3	3	2	3	3	4	2	2	2	3	2	3	3	4	3	3	2	4	2	4	4
1	22	3	4	3	3	1	3	3	4	2	3	2	4	2	6	1	3	3	6	4	1	2	2	1	1	3	2	5	1	2	3	2	1	3	1	1	1	4	3	5	2	5	1	6	4	2	1
1	22	3	4	4	4	3	3	5	5	4	3	2	3	4	5	2	3	3	3	5	4	4	4	5	4	3	2	5	2	4	4	4	2	3	4	4	2	4		3	4	3	2	4	2	5	5
1	22	3	2	2	1	1	3	3	2	3	4	1	1	5	5	5	5	1	5	1	5	1	4	3	1	4	4	5	1	5	4	5	1	4	2	1	3	5	1	5	2	3	1	4	3	5	5
1	19	3	4	4	4	5	4	4	5	4	4	1	4	6	5	2	2	5	2	4	2	6	4	2	2	4	4	5	3	5	4	4	2	4	3	2	1	5	2	5	5	4	3	5	3	4	5
1	20	3	6	6	1	4	6	5	3	4	6	1	1	5	6	4	2	4	2	5	1	4	5	2	2	5	5	3	2	6	6	5	1	4	3	2	2	5	2	6	1	4	2	5	2	6	5
1	20	2	6	4	1	6	3	4	2	3	3	4	1	5	6	2	1	4	3	5	1	5	4	1	3	5	1	6	3	1	6	6	1	4	5	1	1	4	1	6	1	4	1	6	6	2	6
1	18	3	4	1	4	4	2	3	5	3	5	1	6	4	6	5	3	4	2	4	1	4	3	1	4	3	5	5	3	4	3	3	1	4	3	2	2	3	1	5	4	3	1	6	3	5	4
1	20	1	3	3	1	6	6	1	6	6	6	1	6	6	6	1	2	6	1	6	1	6	6	1	1	3	3	4	3	6	6	6	2	5	2	3	1	1	1	5	1	6	1	4	1	1	6
1	19	4	6	1	1	6	6	6	3	1	6	1	2	6	6	1	4	3	1	6	1	5	2	1	1	3	6	6	1	6	4	1	1	3	6	1	1	6	1	6	2	4	5	6	3	6	6
1	18	4	1	1	2	6	6	4	5	3	6	1	5	6	6	2	4	6	1	6	1	6	6	1	1	6	3	1	1	5	4	6	1	4	5	2	1	6	1	4	2	6	5	6	5	6	6
1	17	3	4	4	5	5	6	5	6	3	4	2	1	5	4	3	3	5	6	3	3	5	5	2	2	4	2	3	3	6	6	6	2	4	4	1	4	6	2	5	5	5	2	5	3	5	4
1	21	2	4	3	1	6	6	6	4	3	5	2	2	3	6	6	3	4	2	5	2	5	5	2	2	3	2	2	2	2	5	4	2	2	2	3	2	2	2	5	2	4	3	3	3	5	4
1	20	2	3	2	2	3	3	1	1	3	3	1	1	6	5	5	2	4	2	5	2	3	4	1	2	6	2	2	2	6	4	3	2	3	2	1	2	2	1	6	1	3	3	6	2	3	6
1	19	4	3	2	2	4	1	1	6	4	5	2	5	6	2	2	2	3	2	4	1	2	3	1	2	2	2	2	2	5	3	3	2	2	4	5	2	3	3	6	2	2	3	3	3	2	5
1	21	2	3	3	4	4	3	4	5	5	5	1	3	4	4	6	3	5	1	6	4	4	3	2	3	4	3	2	1	3	5	3	1	4	4	1	3	5	2	5	3	2	2	6	2	6	6
1	21	4	3	1	6	6	6	6	1	1	4	1	1	5	4	3	3	3	2	4	5	4	5	3	4	3	2	5	1	4	4	3	2	4	5	4	3	6	3	4	3	3	3	5	4	4	6
1	21	3	3	1	5	4	3	5	2	4	5	1	3	6	6	6	4	3	3	5	3	6	6	2	4	3	3	3	1	6	3	6	2	3	3	1	1	6	1	6	1	3	1	6	3	2	6
1	19	5	4	2	2	3	5	6	2	3	3	1	6	3	6	4	4	3	3	4	1	3	2	1	5	2	3	5	1	3	2	2	1	3	6	1	2	6	2	6	5	4	3	3	5	5	2
1	19	4	5	3	5	5	5	6	6	3	5	2	1	4	6	6	3	4	4	5	2	3	3	2	3	5	5	1	1	5	3	4	1	3	4	3	1	6	4		4	5	6	6	1	3	4
1	16	3	3	6	2	6	1	3	3	4	5	6	6	3	1	1	2	3	1	6	1	5	3	1	1	4	3	2	2	3	6	6	2	6	6	6	2	4	6	3	6	4	1	6	6	5	6
1	21	3	2	3	1	2	3	2	2	1	3	1	2	5	6	3	5	2	2	2	2	1	2	3	3	3	3	6	3	6	6	5	3	3	5	2	1	6	3	6	3	2	2	6	5	3	6
1	17	3	5	4	6	4	6	6	5	3	5	2	4	4	6	2	5	5	4	5	2	4	5	4	4	2	2	3	3	5	4	5	1	3	2	3	1	5	3	6	3	5	3	4	2	5	6
1	21	4	5	1	1	4	4	6	5	3	5	1	1	6	6	6	5	6	5	6	2	2	4	2	2	4	2	2	1	5	6	6	2	4	5	5	4	3	2	6	2	5	2	6	1	6	6
1	20	3	2	4	1	3	6	4	4	3	4	2	3	6	6	6	1	3	2	5	2	4	3	1	1	4	2	4	2	3	5	5	1	3	3	4	2	4	3	6	2	4	4	3	2	5	6
1	19	2	6	4	3	6	5	6	5	5	4	2	1	6	6	3	4	5	2	5	2	3	4	2	1	5	2	4	1	5	5	5	1	4	4	4	1	6	3	2	2	4	1	6	2	6	6
1	21	3	4	4	4	6	4	4	4	4	3	3	2	6	6	2	2	3	4	4	2	3	3	3	3	2	2	5	2	2	2	6	2	2	5	2	1	6	3	3	4	1	4	4	5	5	3
1		2	5	1	2	6	5	6	5	3	5	2	3	5	4	5	3	4	3	5	2	4	3	4	3	3	5		2	5	5	5	1	3	3	2	2	4	2	5	4	4	3	6	5	4	2
1	21	4	3	5	5	4	2	2	3	3	4	1	5	6	6	6	2	3	6	5	2	4	4	4	2	3	2	3	2	2	3	3	3	2	3	4	3	4	3	4	4	3	4	3	4	3	5
1	19	3	5	3	6	5	6	4	6	3	4	1	3	6	4	6	4	4	3	6	1	5	4	6	3	5	4	6	6	5	4	6	1	3	6	3	1	6	6	6	3	5	1	6	4	6	5
1	21	4	6	1	3	2	1	6	6	4	3	1	6	6	6	2	4	3	4	6	2	6	4	3	2	5	6	4	2	5	4	5	2	4	5	3	1	6	3	4	5	5	4	5	6	4	2
1	18	2	2	3	6	6	6	5	5	4	4	4	4	5	4	3	2	3	3	5	3	5	4	2	3	3	3	4	2	5	5	4	2	3	3	3	2	5	3	4	2	3	2	5	3	5	6
1	18	2	4	4	5	4	3	4	3	4	5	1	2	3	6	5	3	4	1	4	2	4	5	1	4	6	4	3	2	4	4	5	2	4	6	6	1	6	2	6	3	4	2	3	2	6	5
1	19	3	5	1	6	6	2	6	4	3	3	1	3	5	5	3	3	3	2	6	2	3	2	1	4	4	4	4	5		4	4	2	3	4	4	4	4	2	4	4	3	5	5	3	6	6
1	20	5	4	3	5	5	3	2	4		3	5	3	3	6	5	4	5	2	3	4	4	3	1	3	3	4	6	2	6	3	3	3	3	2	1	1	6	1	5	2	3	1	6	3	5	5
1	18	1	3	3	3	6	2	3	3	3	3	3	3	2	3	2	2	3	2	2	2	3	3	2	2	3	3	3	2	3	3	3	2
1	20	3	3	1	3	3	5	4	1	2	6	1	1	3	4	1	3	5	6	3	4	1	2	3	1	3	3	4	2	6	3	5	1	3	2	6	1	5	5	4	2	3	3	6	3	6	1
1	16	3	5	2	2	4	4	4	3	3	3	2	1	4	6	4	3	5	2	1	1	6	5	1	2	4	2	6	3	6	6	5	2	4	2	1	1	6	1	6	3	4	1	6	3	6	6
1	18	4	4	5	4	4	5	4	3	3	3	4	3	4	4	2	4	3	3	4	2	3	3	3	2	3	2	5	2	4	3	4	3	3	4	3	2	3	3	3	4	3	2	4	5	4	2
1	18	3	3	3	2	3	3	4	3	3	3	2	1	3	5	3	3	3	3	3	2	4	4	2	2	3	3	3	2	4	5	3	1	3	4	3	1	5	2	5	2	3	3	4	2	5	3
1	17	3	4	5	4	3	3	4	2	3	2	1	2	3	6	3	3	4	5	6	2	3	3	2	3	2	3		2	3	3	3	2	3	4	1	1	2	2	4	6	2	6	6	6	3	6
1	17	5	5	1	6	6	5	6	5	6		1	2	5	5	2	3	5	1	1	3	5	5	1	1	4	5	5	1	4	5	5	1	4	4	4	1	5	2	2	1	3	1	5	1	5	3
1	16	6	5	4	5	3	6	2	5	2	2	2	1	3	3	6	6	3	6	5	2	2	2	4	4	3	1	6	6	4	4		2	3	6	2	1	3	3	4	3	3	3	4	4	3	4
1	16	6	1	6	6	3	6	3	1	6	1	1	3	3	6	6	5	5	6	1	2	3	3	1	6	4	4	2	6	6	1	3	1	2	4	6	4	1	1	3	3	6	6	6	1	6	3
1	17	2	4	2	3	4	2	2	3	5	4	2	1	5	2	2	3	6	2	4	1	5	3	1	2	2	2	2	1	5	2	6	1	5	5	5	3	5	1	6	2	3	4	3	1		6
2	18	4	5	1	1	3	1	6	6	2	2	1	1	2	3	1	1	3	5	6	1	3	1	1	3	3	3	1	1	1	3	1	1	2	5	1	1	5	1	6	1	3	4	6	3	3	4
2	16	2	2	3	4	4	4	5	6	4	4	3	3	4	4	4	4	4	4	5	2	4	5	2	4	4	4	2		5	3	5	1	3	3	5	2	5	3	4	2	4	3	5	4	4	5
2	17	1	4	3	6	3	5	4	5	4	4	4	6	6	3	1	2	4	3	6	4	3	3	2	5	4		6	3	1	2	6	2	2	2	2	5	5	4	5	4	3	5	2	6	6
2	13	1	4	1	3	2	1	1	1	3	3	1	1	2	6	1	3	4	3	6	1	1	3	1	3	6	4	6	2	4	1	4	1	3	4	6	1	6	1	6	5	3	2	6	5	2	5
2	17	2	5	3	1	6	5	5	4	4	5	1	1	6	5	2	2	4	6	4	1	5	2	2	2	3	5	6	2	4	5	3	2	4	2	1	2	4	3	4	5	3	4	6	5	5	6
2	19	1	3	1	2	6	2	6	6	6	6	1	3	5	6	6	3	6	1	6	2	5	6	1	3	6	6	1	5	6	6	6	1	5	1	1	1	6	5	4	4	4	6	6	1	6	4
2	20	2	6	3	5	6	4	4	4	4	6	2	1	5	6	3	4	5	4	6	3	5	4	1	3	4	3	4	2	5	6	5	2	5	4	1	1	5	2	3	5	6	5	6	3	6	6
2	19	3	6	5	1	5	2	5	5	3	3	2	2	5	6	1	2	4	4	5	2	3		1	4	2	6	1	5	5	6	4	2	3	5	1	1	5	2	5	5	4	5	5	3	4	3
2	20	3	4	2	4	4	5	2	3	3	4	1	1	5	6	1	5	2	3		2	3	3	2	2	2	3	2	2	3	4	4	2	3	5	4	1	3	4	4	3	3	6	5	3	4	4
2	21	4	2	3	3	5	5	6	2	3	5	1	2	6	6	2	1	3	2	6	1	5	3	1	2	3	1	5	1	6	6	5	2	2	5	4	1	6	2	6	1	4	5	5	2	6	3
2	18	2	1	3	5	5	6	6	6	5	6	2	4	5	6	6	5	6	2	6	2	3	3	3	4	4	2	5	3	3	6	5	3	4	5	3	1	5	2	6	6	5	2	6	4	6	5
2	22	4	5	5	3	5	3	5	4	2	2	1	1	3	6	1	3	3	4	4	2	2	3	2	3	1	2	4	3	4	2	6	1	2	5	2	1	3	3	5	5	2	5	6	2	6	4
2	21	6	6	6	3	2	6	6	4	1	3	6	6	1	4	1	5	1	6	6	5	1	4	1	2	2	1	6	1	3	1	3	3	1	6	1	1	1	2	3	6	2	2	6	2	1	6
2	21	4	5	1	3	3	4	6	5	3	5	3	4	5	5	2	3	3	4	5	3	2	6	3	3	4	3	5	3	6	6	6	2	3	5	2	2	5	2	6	6	6	6	5	5	4	5
2	18	3	5	4	6	4	3	3	2	3	4	2	6	4	6	2	4	3	2	4	2	2	2	2	1	3	3	1	1	5	3	4	2	3	5	3	1	5	3	4	4	5	1	1	3	3	5
2	19	3	5	4	2	6	3	6	2	3	5	1	2	6	6	6	1	4	2	6	1	4	3	1	3	4	3	6	1	5	5	4	1	3	2	1	1	6	3	6	6	5	1	6	2	6	5
2	18	2	4	2	3	3	2	5	2	2	3	1	3	3	5	2	2	4	3	1	2	3	2	3	3	3	3	5	2	3	3	2	2	2	3	2	1	4	1	5	2	3	5	2	3	3	3
2	22	1	2	6	1	1	1	6	6	3	1	1	6	6	6	6	1	6	6	6	1	1	1	2	3	3	5	6	4	1	1	6	1	6	6	3	1	3	6	3	6	6	6	1	4	1	1
2	21	2	3	3	4	4	4	5	5	4	3	2	2	6	5	2	4	4	3	5	2	3	3	2	2	3	2	6	3	4	4	4	2	3	2	5	2	3	1	5	5	3	5	4	3	3	5
2	16	3	2	1	3	3	3	3	3	3	3	2	3	3	6	2	3	3	3	2	1	3	3	2	2	3	3	4	2	3	3	6	1	3	3	1	1	3	2	4	6	3	2	3	3	3	3
2	16	2	2	3	4	4	2	3	2	5	6	1	3	4	6	5	1	5	1	6	1	3	2	1	1	6	4	1	1	3	3	3	3	3	3	3	1	6	1	6	3	3	2	6	2	5	6
2	21	4	5	3	3	3	1	2	1	3	4	1	2	6	1	2	3	3	4	6	1	4	3	4	2	6	2	4	1	6	5	6	1	4	5	3	1	6	2	6	5	4	4	5	1	6	2
2	19	6	4	2	4	6	3	6	2	2	5	1	1	6	6	1	4	3	3	6	1	4	1	1	1	4	2	1	2	1	4	6	1	3	6	6	6	5	1	6	6	5	1	4	4	3	3
2	18	3	5	1	2	5	1	4	4	2	2	1	2	4	3	5	2	3	2	5	2	4	2	1	5	2	2	5	1	4	6	3	2	2	2	1	2	3	2	4	5	3	2	6	3	6	3
2	22	1	4	5	1	3	6	6	6	4	5	2	3	4	6	2	2	3	2	6	2	4	5	2	3	4	3		1	6	5	6	1	5	5	4	1	6	2	5	4	4	2	5	2	5	3
2	18	2	3	2	4	3	1	6	5	2	3	1	3	5	6	1	5	2	2	3	2	4	5	1	3	3	3	6	1	3	3	5	2	3	1	2	1	6	2	6	4	4	5	6	2	6	6
2	20	3	3	1	1	5	5	6	3	3	6	2	3	6	6	4	2	4	1	6	1	4			3	5	6	4	1	6	6	4	1	4	2	2	1	6	1	6	5	4	4	6	2	6	6
2	18	2	3	3	1	5	2	3	3	3	3	2	2	5	5	3	2	4	3	3	2	3	3	1	2	2	3	3	1	2	4	3	2	3	2	3	1	6	5	5	2	4	3	6	2	4	4
2	17	3	3	4	3	5	2	2	5	4	5	1	4	4	5	2	1	3	2	5	1	3	3	1	2	3	2	4	2	3	3	3	3	4	3	1	4	3	4	4	3	4	3	6	2	5	5
2	19	2	2	3	1	6	6	6	1	3	6	1	1	6	6	1	3	6	1	6	1	3	3	1	3	3	6	1	3	6	6	3	1	3	1	1	1	6	1	3	3	3	6	6	6	6	6
2	19	3	4	4	2	3	3	5	4	2	4	3	2	3	4	2	3	2	5	6	2	3	2	2	2	3	3	2	2	3	3	3	2	2	3	2	2	3	2	4	4	2	2	5	3	4	2
2	16	2	2	1	2	4	5	5	5	4	4	2	3	5	6	4	3	3	1	6	1	6	5	1	3	4	2	3	1	2	5	4	2	3	2	1	1	2	1	3	4	3	2	2	2	5	6
2	21	3	2	4	3	4	4	4	4	4	4	5	3	4	6	1	3	5	3	5	1	4	4	3	2	5	4	6	3	4	5	4	2	4	2	1	2	4	2	6	2	4	2	6	3	3	3
2	18	2	4	4	6	6	3	4	2	3	6	1	5	6	6	3	1	3	2	1	1	6	6	2	2	2	6	6	1	6	6	5	1	6	1	2	1	6	1	6	5	5	1	6	5	6	6
2	17	6	3	6	4	3	5	4	4	4	6	2	2	4	4	2	1	3	4	5	6	3	3	2	4	6	3	4	1	3	4	4	2	4	2	3	3	6	2	4	4	4	6	6	3	5	3
2	18	3	6	1	6	4	6	4	4	4	6	1	5	6	6	5	3	4	3	6	1	4	3	3	2	2	2	1	3	3	3	1	2	2	6	4	1	6	4	3	2	2	1	3	4	3	4
2	15	4	3	1	1	2	1	6	2	3	5	3	1	2	2	2	2	1	3	6	1	3	4	3	1	2	5	6	4	6	6	6	1	5	1	5	1	6	2	6	5	5	4	6	2	4	6
2	18	3	3	3	4	4	2	5	6	2	3	1	1	3	5	2	2	4	3	6	4	2	2	2	2	5	4	6	2	1	5	3	2	4	4	2	2	5	2	5	3	3	3	5	2	6	6
2	17	3	6	2	1	4	3	6	6	5	4	1	1	4	6	6	3	5	2	1	6	6	1	2	3	1	6	1	6	6	4	4	2	3	6	1	1	6	1	5	6	4	5	6	3	6	6
2	21	1	6	1	6	4	6	1	1	3	6	1	3	3	6	1	6	6	6	6	1	2	3	6	3	3	1	6	3	3	6	6	1	4	6	5	6	6	3	1	6	6	6	6	6	6	6
2	17	3	3	6	6	4	3	5	4	2	6	3	4	2	4	6	3	3	1	5	1	3	3	1	4	6	3	3	5	3	3	4	3	3	1	3	3	1	6	4	6	6	6	6	6	6	6
2	17	4	4	6	3	4	4	4	5	2	3	1	1	3	6	2	3	3	3	3	3	3	2	2	2	3	3	4	3	3	4	5	3	3	3	1	3	5	1	5	4	3	6	4	2	5	3
2	18	4	5	2	3	5	2	6	4	2	3	1	1	6	4	6	6	3	3	5	2	2	3	1	1	2	2	5	2	3	3	4	2	3	3	2	1	6	2	6	3	2	3	6	6	6	4
2	16	2	4	3	6	5	2	5		6	5	2	6	4	5	6	4	5	2	3	3	4	4	2	5	6	3	4	3	5	5	5	3	5	4	4	2	6	2	6	2	4	5	5	3	6	6
